# Supplementary material
Source: MDPI journal article supplement (https://www.mdpi.com/2073-4468/2/1/82)
Supplement: s1 [file s1]

**Table 1.** Targeted Toxins directed against CSC markers currently under investigation.

| Target     | Name                                     | Toxin                              | Cancer           | Phase of Development       | Reference       |
|------------|------------------------------------------|------------------------------------|------------------|----------------------------|-----------------|
| IL3        | DT <sub>388</sub> IL3                    | Diphtheria Toxin                   | AML              | Phase I                    | [9]             |
| CD123      | 26292(Fv)-PE38-KDEL                      | Pseudomonas Exotoxin A             | AML              | Preclinical                | [10]            |
| CD44       | Bivatsumab Mertansine                    | Maytansine Derivative              | HNSCC            | Phase I                    | [16,17]         |
| EpCAM      | chiHEA125-Ama                            | $\alpha$ -Amanitin                 | Pancreas         | Preclinical                | [24]            |
| EpCAM      | Ec4-ETA                                  | Pseudomonas Exotoxin A             | Colon            | Preclinical                | [26]            |
| EpCAM      | Opportuzumab Monatox                     | Pseudomonas Exotoxin A             | Bladder<br>HNSCC | Phase II<br>Phase I        | [27,28]<br>[29] |
| EpCAM      | VB6-845                                  | deBouganin                         | Breast           | Preclinical                | [30]            |
| EpCAM/Her2 | DTEpCAM23                                | Diphtheria Toxin                   | Colon            | Preclinical                | [23]            |
| CD133      | CdtA <sup>C149A, C178A</sup> BC-CD133MAb | Cytolethal Distending Toxin        | HNSCC            | Preclinical                | [35]            |
| CD133      | dCD133KDEL                               | Deimmunized Pseudomonas Exotoxin A | HNSCC<br>Breast  | Preclinical<br>Preclinical | [36]<br>[38]    |

Notes: Several laboratories are now investigating a range of different approaches and toxins targeting cancer stem cell associated markers. In several of the preclinical studies, more than one cancer type was investigated.

**Table 2.** A summary of the cancer and model types used to date by our group in evaluating the efficacy of dCD133KDEL.

| Cell Line  | Cancer Type | Model Type      | Response Obtained  | Reference        |
|------------|-------------|-----------------|--------------------|------------------|
| UMSCC-11B  | HNSCC       | Flank           | Regression         | [36]             |
| MDA-MB-231 | Breast      | Systemic        | Partial Regression | [38]             |
| OVCAR-5    | Ovarian     | Interperitoneal | Regression         | Unpublished Data |

Notes: Our group has published independent reports using 3 different xenograft models to assess the efficacy of dCD133KDEL in immunodeficient mice.
